# Supplementary material for: Doc2B acts as a calcium sensor for vesicle priming requiring synaptotagmin-1, Munc13-2 and SNAREs
Source: eLife journal article supplement (doi:10.7554/elife.27000), 2017-12-23
Supplement: supp [file elife-27000-supp-v1.zip]

| Doc2 KO               |                   |       |                    |       |                   |      |
|-----------------------|-------------------|-------|--------------------|-------|-------------------|------|
|                       | Low [Ca] ~ 200 nM |       | High [Ca] ~ 800 nM |       |                   |      |
|                       | mean              | SEM   | mean               | SEM   |                   |      |
| fast burst (fF)       | 49.76             | 12.90 | 72.10              | 9.87  | Ratio High/low Ca |      |
| slow burst (fF)       | 19.18             | 12.53 | 63.59              | 15.24 |                   |      |
| fast time const. (ms) | 23.56             | 6.43  | 12.37              | 20.10 |                   |      |
| slow time const. (s)  | 0.22              | 0.07  | 0.16               | 0.05  |                   |      |
| <i>Priming 1</i>      | 19.18             | 12.53 | 63.59              | 15.24 | Mean              | SEM  |
| <i>Priming 2</i>      | 2.59              | 0.70  | 1.13               | 0.28  | 3.32              | 0.70 |
|                       |                   |       |                    |       | 0.44              | 0.36 |

| DocB WT expression in KO |                   |       |                    |       |                   |      |
|--------------------------|-------------------|-------|--------------------|-------|-------------------|------|
|                          | Low [Ca] ~ 200 nM |       | High [Ca] ~ 800 nM |       |                   |      |
|                          | mean              | SEM   | mean               | SEM   |                   |      |
| fast burst (fF)          | 65.53             | 6.26  | 136.3              | 16.28 | Ratio High/low Ca |      |
| slow burst (fF)          | 61.48             | 8.21  | 82.69              | 11.76 |                   |      |
| fast time const. (ms)    | 15.05             | 1.91  | 10.57              | 1.83  |                   |      |
| slow time const. (s)     | 0.174             | 0.017 | 0.178              | 0.048 |                   |      |
| <i>Priming 1</i>         | 61.48             | 8.21  | 82.69              | 11.76 | Mean              | SEM  |
| <i>Priming 2</i>         | 1.07              | 0.16  | 1.65               | 0.19  | 1.34              | 0.20 |
|                          |                   |       |                    |       | 1.55              | 0.19 |

| Doc2B DN expression in KO |                   |       |                    |       |                   |      |
|---------------------------|-------------------|-------|--------------------|-------|-------------------|------|
|                           | Low [Ca] ~ 200 nM |       | High [Ca] ~ 800 nM |       |                   |      |
|                           | mean              | SEM   | mean               | SEM   |                   |      |
| fast burst (fF)           | 124.4             | 16.33 | 124.5              | 14.82 | Ratio High/low Ca |      |
| slow burst (fF)           | 105.3             | 13.55 | 65.74              | 5.54  |                   |      |
| fast time const. (ms)     | 14.48             | 1.65  | 6.76               | 0.55  |                   |      |
| slow time const. (s)      | 0.15              | 0.012 | 0.106              | 0.022 |                   |      |
| <i>Priming 1</i>          | 105.3             | 13.55 | 65.74              | 5.54  | Mean              | SEM  |
| <i>Priming 2</i>          | 1.18              | 0.18  | 1.89               | 0.15  | 0.62              | 0.15 |
|                           |                   |       |                    |       | 1.60              | 0.17 |

|                                 | Low [Ca] |      | High [Ca] |      |
|---------------------------------|----------|------|-----------|------|
| Ratio <i>priming 1</i> Doc2B/KO | Mean     | SEM  | Mean      | SEM  |
| WT                              | 3.21     | 0.67 | 1.30      | 0.28 |
| DN                              | 5.49     | 0.67 | 1.03      | 0.25 |
| Ratio <i>priming 2</i> Doc2B/KO | Mean     | SEM  | Mean      | SEM  |
| WT                              | 0.41     | 0.31 | 1.45      | 0.27 |
| DN                              | 0.46     | 0.31 | 1.67      | 0.26 |

**Figure 10 – Figure supplement 1.**
