# Supplementary figures and images for: Doc2B acts as a calcium sensor for vesicle priming requiring synaptotagmin-1, Munc13-2 and SNAREs
Source: eLife journal article supplement (doi:10.7554/elife.27000), 2017-12-23

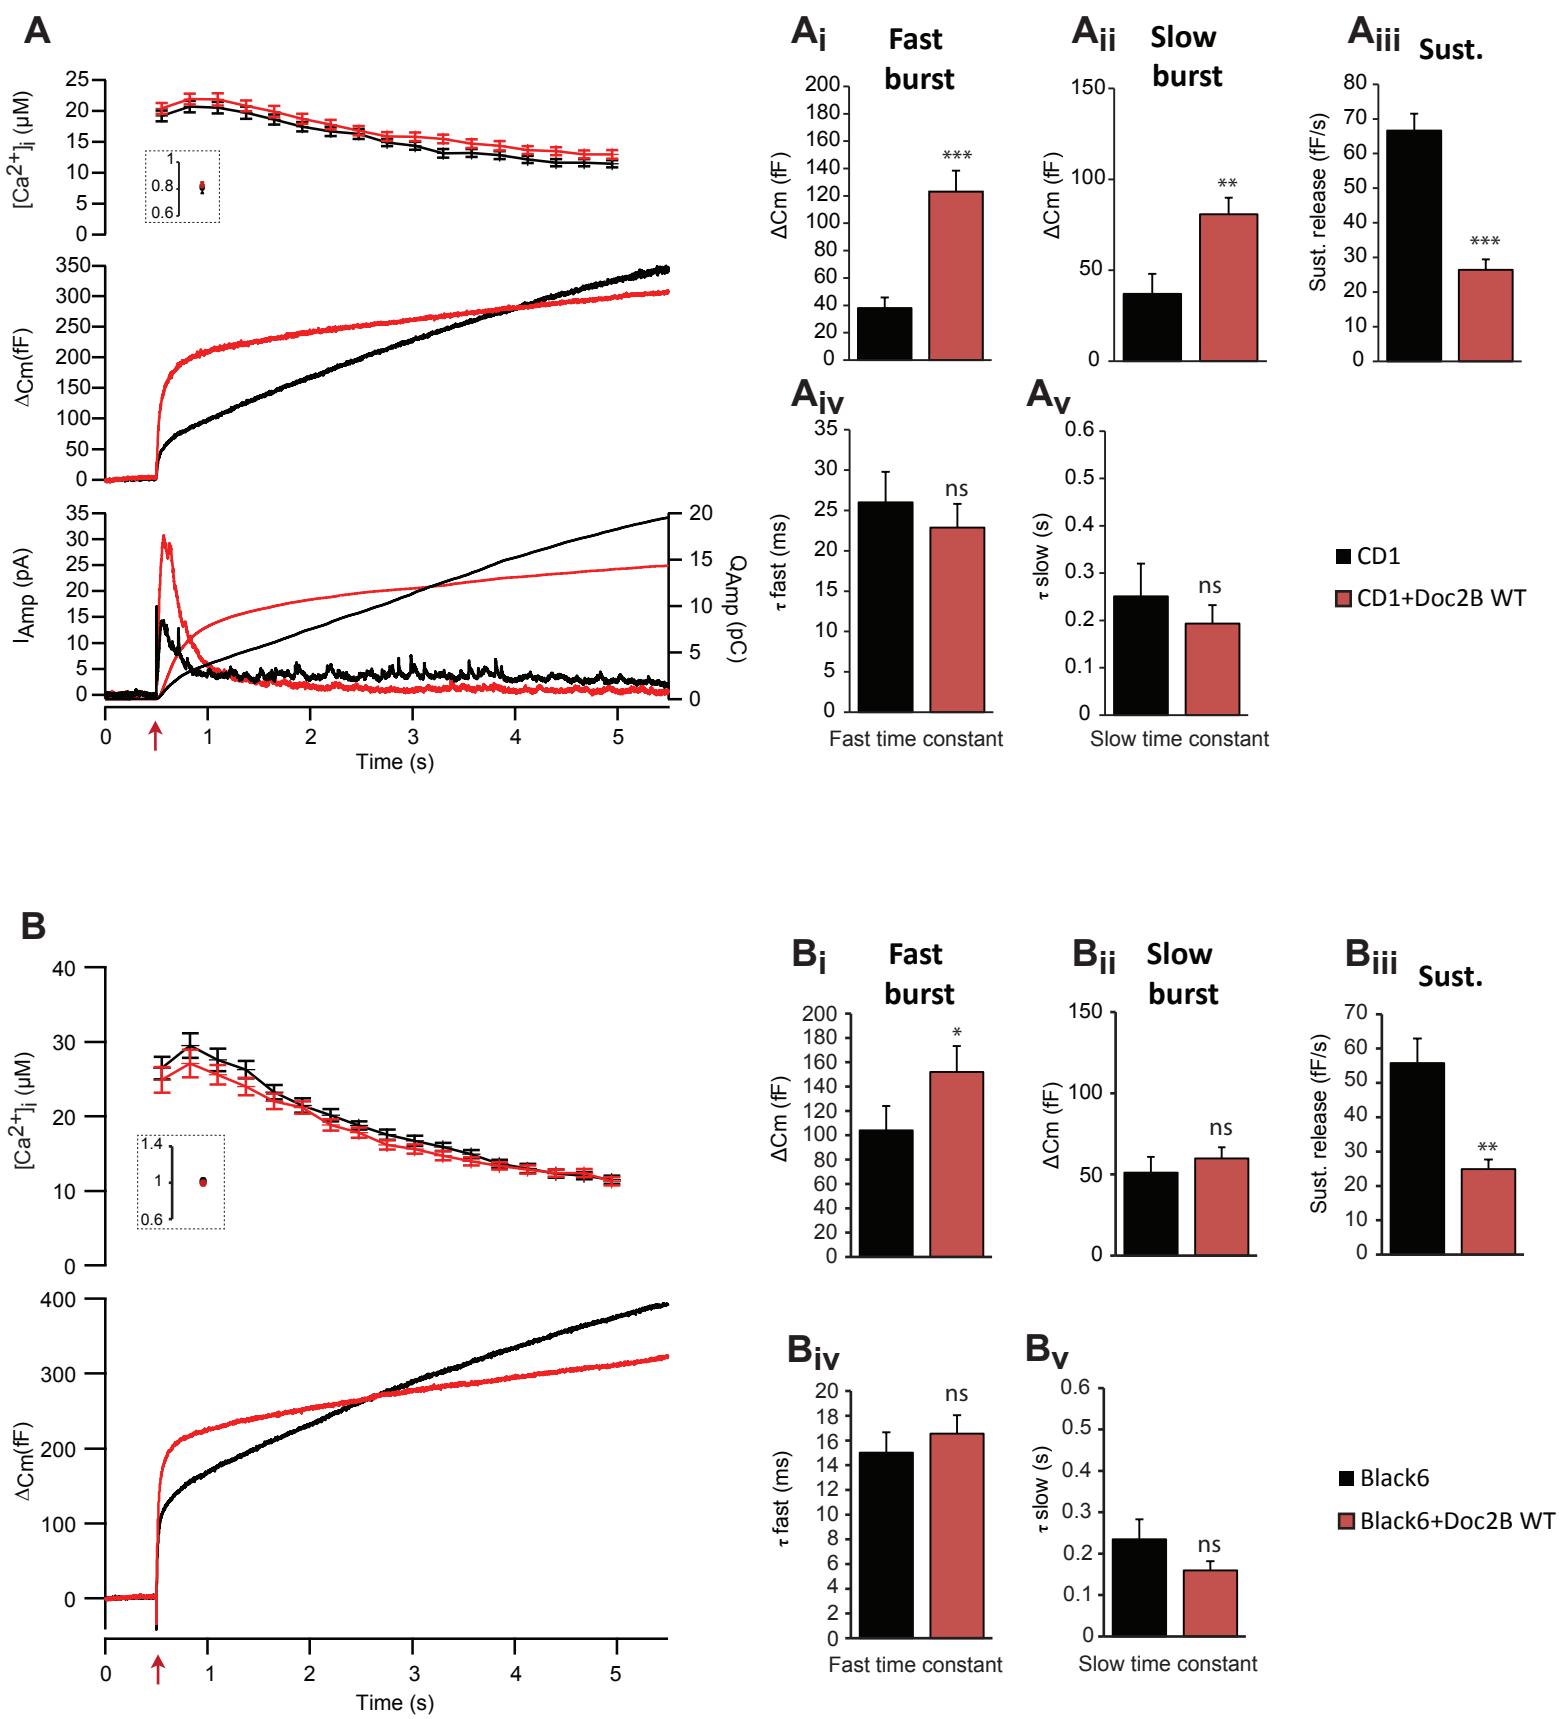

**FIGURE 1- Figure Supplement 1**

Supplement: supp [file elife-27000-supp-v1.zip]

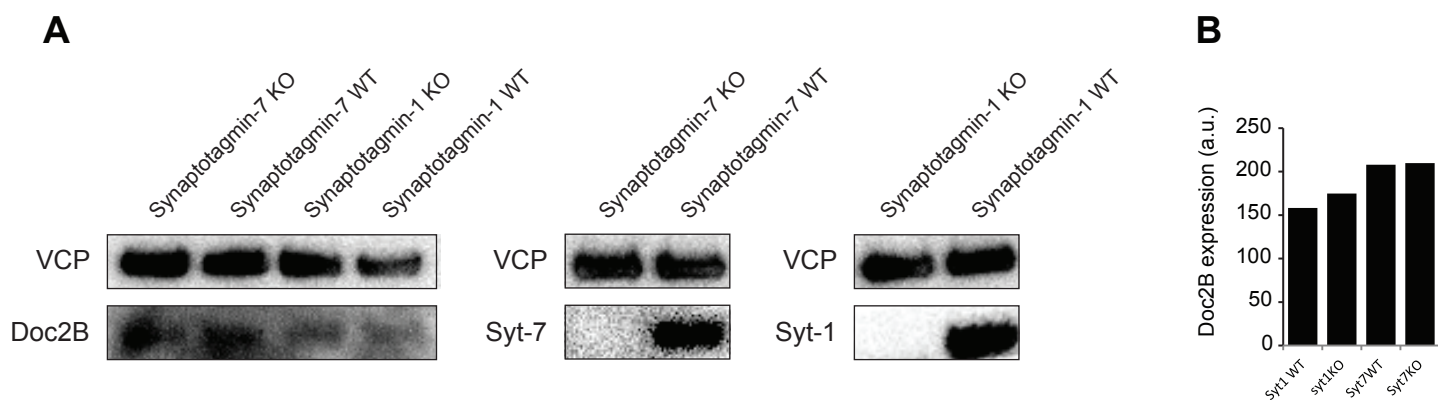

**Figure 1- Figure Supplement 2**

Supplement: supp [file elife-27000-supp-v1.zip]
